# Supplementary material for: Porous aromatic frameworks (PAFs) as efficient supports for N-heterocyclic carbene catalysts
Source: Royal Society of Chemistry journal article supplement (doi:10.1039/c6cy00597g), 2016-01-01
Supplement: c6cy00597g1.pdf [file c6cy00597g1.pdf]

# Porous Aromatic Frameworks (PAFs) as efficient supports for *N*-heterocyclic carbene catalysts.

*Elizabeth Rangel-Rangel, Ester Verde-Sesto, Antonia M. Rasero-Almansa, Marta*

*Iglesias, Félix Sánchez.* [felix-igo@iqog.csic.es](mailto:felix-igo@iqog.csic.es), [marta.iglesias@icmm.csic.es](mailto:marta.iglesias@icmm.csic.es)

## Supporting Information

|                                                   |         |
|---------------------------------------------------|---------|
| I.-General information                            | S2      |
| II.- . Preparation of PAF-NHC-precursors          | S3-S6   |
| III. Preparation of PAF(NHC)M                     | S7      |
| IV. Characterization Data. Tables S1, S2          | S8      |
| FTIR spectra, Figures S1-S2                       | S9-S10  |
| <sup>13</sup> C solid state CP MAS NMR Figures S3 | S11-S15 |
| Thermogravimetric analysis: Figures S4            | S17     |
| SEM images: Figures S5                            | S18     |
| X-Ray diffraction: Figure S6                      | S18     |
| Textural analysis: Figure S7                      | S19-S21 |
| Catalytic activity Figures S8-S9                  | S22     |
| Catalytic activity Tables S3-S6                   | S24-S26 |

## I. General Information.

- $^1\text{H}$  and  $^{13}\text{C}$ -NMR spectra of monomers and homogeneous catalysts were recorded in a Bruker Avance 300 MHz spectrometer (Larmor frequencies of 300 MHz for  $^1\text{H}$  and 75 MHz for  $^{13}\text{C}$ ). Solvents used for the NMR spectra were  $\text{CDCl}_3$  or  $\text{DMSO-d}_6$ . The solid-state  $^{13}\text{C}$  NMR spectra were recorded in a Bruker AV-400-WB spectrometer (Larmor frequency of 100 MHz for  $^{13}\text{C}$ ), using 4-mm MAS probes spinning at a rate of 10 KHz for  $^{13}\text{C}$  solid-state magic angle spinning nuclear magnetic resonance (MAS NMR) measurements. The spectra were obtained using a contact time of 3.5 ms and a relaxation time of 4 s with 1024 scans.
- Fourier Transform Infrared Spectra (FTIR) of all compounds and materials were recorded on a Perkin-Elmer RX-1 instrument and are reported in terms of the frequency of absorption ( $\text{cm}^{-1}$ ).
- Microanalyses were made with a Carlo Erba EA1108 elemental analyzer (C, H, N) and the Energy-dispersive X-ray spectroscopy (EDX) measurements of the  $\text{PAF}_\text{S}$  were made in a Philips Model XL30 ESEM.
- Thermogravimetric analysis (TGA) data were obtained on a TA Q-500 analyzer under air atmosphere, using approximately 5 mg of sample under a flow of 60 mL/min. The samples were heated from 40 to 850  $^\circ\text{C}$  at 10  $^\circ\text{C}/\text{min}$ .
- Specific surface area measurements and porosity analysis were performed using  $\text{N}_2$  adsorption isotherms (Micromeritics, ASAP 2020 MICROPOROUS DRY Analyzer) using the BET method for surface area calculation and the BJH method for average pore size and pore volume calculations
- Wide-angle X-ray scattering (WAXS) was carried out using a Bruker D8 Advance diffractometer. Data were collected stepwise over the angular region of  $5^\circ \leq 2\theta \leq 65^\circ$ , using steps of 0.5 s/step accumulation time, a Vantec detector, and  $\text{Cu K}\alpha$  radiation ( $\lambda = 1.542 \text{ \AA}$ ).
- Scanning electron microscopy (SEM) micrographs were obtained with a Hitachi Model SU-8000 microscope operating at 0.5 kV. The samples were prepared directly by dispersing the powder onto a double-sided adhesive surface.
- Metal contents were analyzed by Inductively Coupled Plasma Optical Emission Spectroscopy (ICP-OES) on a Perkin Elmer OPTIMA 2100 DV.
- The reactions were monitored by gas chromatography on HP5890 II and Konik HRGC 4000B GC-MS chromatographs with a cross-linked (95%)-dimethyl-(5%)-

diphenylpolysiloxane (Teknokroma TRB-5MS) column of 30 meters of length; helium as carrier gas.

- Mesitylimidazole and 2-(2'-pyridyl)imidazole were synthesized in our laboratory according to the literature procedure.<sup>1</sup>

## II. Preparation of PAF-NHC-precursors.

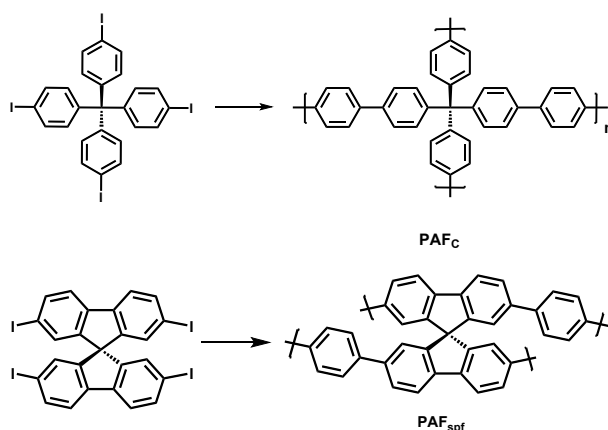

**Scheme S1:** 1,4-phenylenediboronic acid, MW, 12 bar, 145 °C, 10 min.

*Microwave assisted synthesis of PAF<sub>c</sub>:* 200 mg (0.230 mmol) of tetrakis(4-iodophenyl)methane, 2.2 equivalents (84 mg, 0.506 mmol) of the corresponding diboronic acid, triphenylphosphine (30 mg, 0.115 mmol), sodium bicarbonate (85 mg, 1.31 mmol) and palladium acetate (3 mg, 0.015 mmol) were suspended in a mixture of 2 mL DMF and 0.5 mL water. The mixture was degassed by N<sub>2</sub>

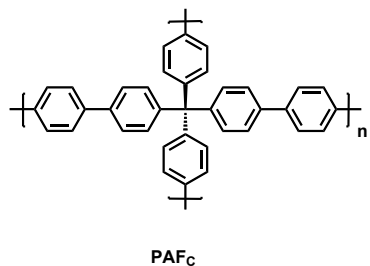

bubbling. Microwave heating was performed in a computer controlled CEM Discover microwave with temperature and pressure control. Initial heating was performed at a power input of 75W. After the pressure has reached approx. 12 bar, the heating was stopped for 1 min. After that period heating was continued to reach the reaction temperature of approx. 145 °C. The reaction was run at that temperature and a pressure of approx. 5-7 bar for 10 min. After cooling to room temperature, the mixture was filtered and the crude product was washed for approx. 1 h with a solution of 50 mL of water, 1 mL of HNO<sub>3</sub> conc. and 1 mL of HCl conc. to remove Pd impurities. The mixture was filtered and the crude product was washed with DMF (3 x 30 mL), THF (3

<sup>1</sup> B. E. Ketz, A. P. Cole and R. M. Waymouth, *Organometallics*, 2004, **23**, 2835.

x 30 mL), water (3x 30 mL), CH<sub>2</sub>Cl<sub>2</sub> (3 x 30 mL) and diethyl ether (2 x 20 mL). After drying *in vacuo* a pale yellow powder was obtained. The reaction yield was nearly quantitative based on the molecular weight of the ideal, fully condensed products. Elemental analysis: Calc. for C<sub>37</sub>H<sub>24</sub>: C, 94.0; H, 5.2; Found C, 85.1, H, 5.2 %. BET Surface Area (m<sup>2</sup>·g<sup>-1</sup>): 393 Pore Volume (cm<sup>3</sup>·g<sup>-1</sup>): 0.45, Average Pore Size (nm): 8.5 (Estimated by BHJ method).

*PAF<sub>Ad</sub>*: Elemental analysis: Calc. C<sub>46</sub>H<sub>36</sub>: C, 93.2; H, 6.8; Found C, 87.04, H, 4.38 %. for BET Surface Area (m<sup>2</sup>·g<sup>-1</sup>): 515 Pore Volume (cm<sup>3</sup>·g<sup>-1</sup>): 0.42, Average Pore Size (nm): 5.5 (Estimated by BHJ method).

*Microwave assisted synthesis of PAF<sub>spt</sub>*. 259 mg (0.316 mmol) of 2,2',7,7'-tetraiodo-9,9'-spirobisfluorene,<sup>2</sup> 105 mg (0.632 mmol) of 1,4-phenylenediboronic acid, 41 mg (0.158 mmol) of triphenylphosphine, 117 mg (1.39 mmol) of sodium bicarbonate

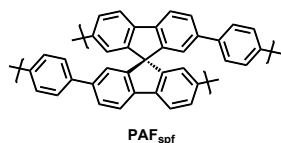

and 3.5 mg (0.016 mmol) of palladium acetate are suspended in a mixture of DMF (2 mL) and water (0.5 mL). The mixture was degassed by argon bubbling. Microwave heating was performed in a computer controlled CEM Discover microwave with temperature and pressure control. Initial heating was performed at a power input of 75 W. After the pressure has reached approx. 10 bars, the heating was stopped until cooled at 60°C and the pressure disappears. After that period heating was continued to reach the reaction temperature of approx. 145°C. The reaction was run at that temperature and a pressure of approx. 7 bars for 5 min. After cooling to room temperature, the mixture was filtrated and the crude product was washed with DMF and water. The solid was suspended in a mixture of water (100 mL), hydrochloric acid (1 mL) and nitric acid (2 mL) and heated to reflux to remove Pd impurities, until to obtain yellow color. Finally, the sample was filtrated and washed with THF and diethyl ether. After drying under *vacuum* a pale yellow powder was obtained.

Elemental analysis: Calc. for C<sub>37</sub>H<sub>20</sub>: C, 94.8; H, 5.2; Found C, 87.0 %, H, 5.3 %. FT-IR (KBr):  $\nu$  = 1709, 1603, 1461, 1400, 1246, 1181, 1111, 1077, 1003, 815, 764, 736, 697 cm<sup>-1</sup>. BET Surface Area (m<sup>2</sup>·g<sup>-1</sup>): 580 Pore Volume (cm<sup>3</sup>·g<sup>-1</sup>): 0.42, Average Pore Size (nm): 3 (Estimated by BHJ method).

<sup>2</sup> J. Salbeck, D. Lupo, US2003/0111107 A1.

*Synthesis of the chlorobenzyl material, PAF-CH<sub>2</sub>Cl: General method.*

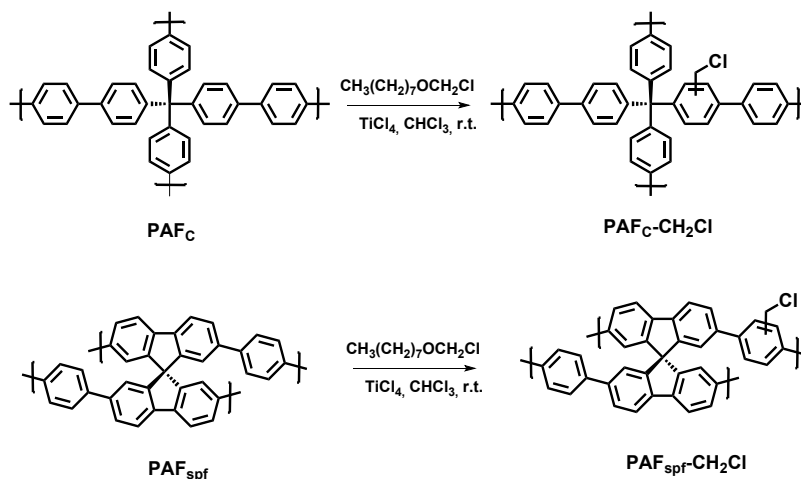

PAF<sub>s</sub> were suspended on chloroform and reacted with CH<sub>3</sub>(CH<sub>2</sub>)<sub>7</sub>OCH<sub>2</sub>Cl in presence of TiCl<sub>4</sub> at room temperature for 24 h, after filtration and drying at 135 °C under vacuum (10–5 mm Hg), PAF-CH<sub>2</sub>Cl was obtained as a white or yellow solid (98%).

**PAF<sub>c</sub>-CH<sub>2</sub>Cl:** <sup>13</sup>C CP-MAS solid state NMR: 146.11, 139.40, 128.93, 65.04, 44.33 ppm. Elemental analysis: C, 77.5 %, H, 5.0 %, Cl, 1.8 %.

**PAF<sub>spf</sub>-CH<sub>2</sub>Cl:** <sup>13</sup>C CP-MAS solid state NMR: 147.70, 140.88, 127.76, 67.02, 43.99 ppm. Elemental analysis: C, 60.4 %, H, 4.1, Cl, 4.0 %.

**PAF<sub>Ad</sub>-CH<sub>2</sub>Cl:** Elemental analysis: C, 78.05%, H, 4.18, Cl, 4.0 %.

*Synthesis of PAF<sub>c</sub>-Im: General method.*

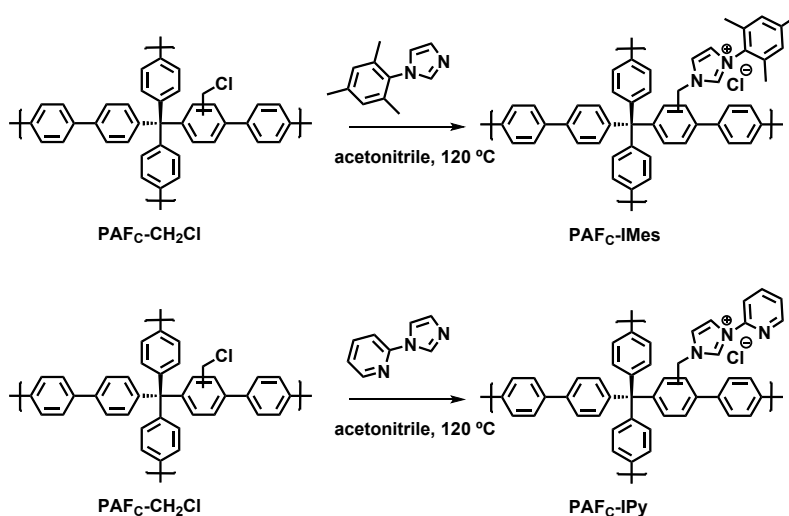

**PAF<sub>c</sub>-CH<sub>2</sub>Cl** (0.5 g, 1.00 mmol) was treated with mesitylimidazole or 2-(2'-pyridyl)imidazole (1.5 mmol) in acetonitrile (30 mL), and the reaction mixture was heated to reflux for 24 h. After filtration, the solid was washed successively with tetrahydrofuran and diethyl ether. Then it was dried under vacuum overnight (135 °C, 10–5 mm Hg) (71-75 %).

**PAF<sub>c</sub>-IMes**: <sup>13</sup>C CP-MAS solid state NMR (125.7 MHz): 146.11, 138.91, 130.34, 128.94, 65.04 ppm. Elemental analysis: C, 65.9 %, H, 4.4 %, N, 1.3 %.

**PAF<sub>c</sub>-IPy**: <sup>13</sup>C CP-MAS solid state NMR (125.7 MHz): 145.86, 139.07, 131.14, 127.48, 64.77 ppm. Elemental analysis: C, 66.6 %, H, 4.5 %, N, 2.4 %.

**PAF<sub>Ad</sub>-IMes**: <sup>13</sup>C CP-MAS solid state NMR (125.7 MHz): 157.5, 149.2, 138.9, 134.8, 128.2, 48.6, 39.8, 18.9 ppm. Elemental analysis: C, 71.3 %, H, 6.0 %, N, 2.90 %.

#### *Synthesis of PAF<sub>spf</sub>-Im: General method.*

These compounds were prepared as described above, from **PAF<sub>spf</sub>-CH<sub>2</sub>Cl**.

**PAF<sub>spf</sub>-IMes**: <sup>13</sup>C CP-MAS solid state NMR (125.7 MHz): 148.14, 140.72, 128.14, 124.57, 67.03 ppm. Elemental analysis: C, 61.1 %, H, 4.8 %, N, 2.9 %.

**PAF<sub>spf</sub>-IPy**: <sup>13</sup>C CP-MAS solid state NMR (125.7 MHz): 147.38, 140.03, 127.18, 123.48, 66.58 ppm. Elemental analysis: C, 58.9 %, H, 4.5 %, N, 4.4 %.

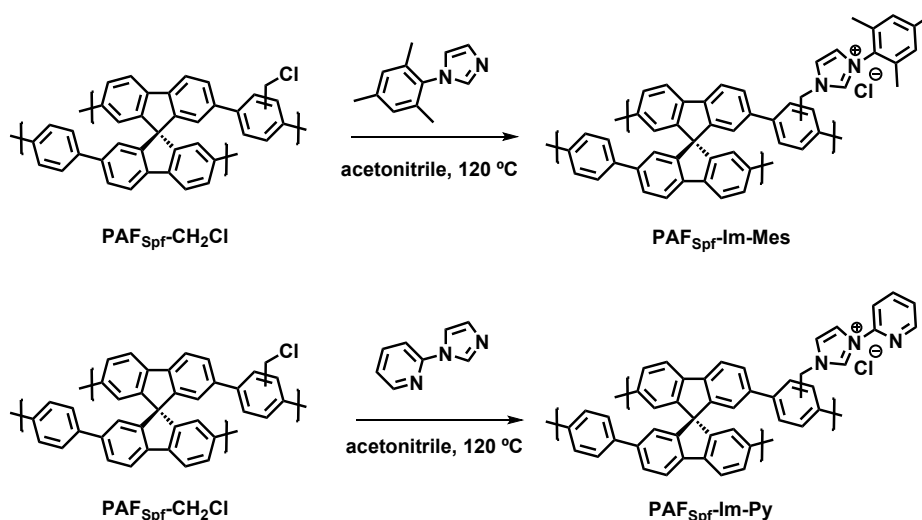

### III. Preparation of PAF-(NHC)M

#### **PAFs-IMesIr and PAFs-IPyIr.**

To a suspension of **PAF-Im** (0.10 mmol) in CH<sub>2</sub>Cl<sub>2</sub> (3 mL), was added Ir(acac)(COD) (0.10 mmol) dissolved in CH<sub>2</sub>Cl<sub>2</sub> (2.0 mL). After stirring for 3 h the reaction mixture

was heated at 40 °C for additional 24 h. The solid was filtered and washed with CH<sub>2</sub>Cl<sub>2</sub>, THF until the filtrate was colorless and dried in vacuum.

**PAF<sub>c</sub>-IMesIr**: <sup>13</sup>C CP-MAS solid state NMR (125.7 MHz): 145.37, 138.69, 130.61, 127.95, 64.83 ppm. Elemental analysis: C, 62.5 %, H, 4.6 %, N, 1.2 %. Ir: 3.8 % (0.197 mmol/g).

**PAF<sub>sp</sub>-IMesIr**: Elemental analysis: C, 55.5 %, H, 4.3 %, N, 1.7 %. Ir: 2.6 % (0.133 mmol/g).

**PAF<sub>c</sub>-IPyIr**: Elemental analysis: C, 60.0 %, H, 4.4 %, N, 1.8 %. Ir: 4.5 % (0.226 mmol/g).

**PAF<sub>sp</sub>-IPyIr**: Elemental analysis: C, 58.3 %, H, 4.3 %, N, 2.6 %. Ir: 4.30% (0.224 mmol/g).

*PAFs-IMesRu and PAFs-IPyRu.*

To a suspension of **PAF-Im** (0.10 mmol) in toluene (2.0 mL) a solution of potassium *bis*(trimethylsilyl)amide ([[(CH<sub>3</sub>)<sub>3</sub>Si]<sub>2</sub>NK, 20 mg, 0.10 mmol) in toluene was dropwise added at 0 °C and the mixture stirred for 1 h at room temperature under N<sub>2</sub> and then, [Ru(*p*-cymene)Cl<sub>2</sub>]<sub>2</sub> (45 mg, 0.07 mmol) in toluene (2.0 mL) was added. After stirring for 48 h at 60 °C, the reaction mixture was filtered, and the solid was washed several times with dichloromethane and THF until the filtrate was colorless and finally dried under vacuum.

**PAF<sub>c</sub>-IMesRu**: <sup>13</sup>C CP-MAS solid state NMR (125.7 MHz): 143.99, 139.47, 129.67, 65.55 ppm. Elemental analysis: C: 60.9 %; H: 4.5 %; N: 2.0 %; Ru: 1.22 % (0.122 mmol/g).

**PAF<sub>sp</sub>-IMesRu**: Elemental analysis: C: 53.6 %; H: 4.0 %; N: 2.2 %; Ru: 1.97 % (0.195 mmol/g).

**PAF<sub>c</sub>-IPyRu**: Elemental analysis: C: 57.3 %; H: 4.1 %; N: 2.1 %; Ru: 2.34 % (0.231 mmol/g).

**PAF<sub>Ad</sub>-IMesRu**: <sup>13</sup>C CP-MAS solid state NMR (125.7 MHz): 49, 127, 134, 141 ppm. Elemental analysis: C: 59.7%; H: 4.9%; N: 1.8%; Ru: 1.0% (0.1 mmol/g)

#### IV. Characterization Data.

Table S1. Elemental analyses of the **PAF**-NHC-precursors.<sup>[a]</sup>

| Compound                                              | Funct.<br>(%) <sup>[b]</sup> | C [wt%]     | H [wt%]     | Cl [wt%]    | N [wt%]     |
|-------------------------------------------------------|------------------------------|-------------|-------------|-------------|-------------|
|                                                       |                              | calc./found | calc./found | calc./found | calc./found |
| PAF <sub>c</sub> (C <sub>37</sub> H <sub>24</sub> )   |                              | 94.0/85.10  | 5.2/5.18    | -           | -           |
| PAF <sub>c</sub> -CH <sub>2</sub> Cl                  | 30                           | 91.96/77.46 | 5.86/4.96   | 2.18/1.8    | -           |
| PAF <sub>c</sub> -IMes                                | 30                           | 90.37/65.94 | 6.15/4.41   | -           | 1.53/1.34   |
| PAF <sub>c</sub> -IPy                                 | 30                           | 89.76/66.62 | 5.89/4.51   | -           | 2.36/2.39   |
| PAF <sub>Ad</sub> (C <sub>46</sub> H <sub>36</sub> )  |                              | 93.2/87.04  | 6.80/4.38   | -           |             |
| PAF <sub>Ad</sub> -CH <sub>2</sub> Cl                 | 70                           | 89.49/78.05 | 6.55/4.18   | 3.96/4.0    | -           |
| PAF <sub>Ad</sub> -IMes                               | 70                           | 87.22/71.30 | 7.02/6.0    | -           | 2.54/2.90   |
| PAF <sub>Ad</sub> -IPy                                | 60                           | 86.89/66.04 | 6.66/4.50   | -           | 3.49/3.23   |
| PAF <sub>spf</sub> (C <sub>37</sub> H <sub>20</sub> ) |                              | 94.8/87.0   | 5.2/5.3     | -           | -           |
| PAF <sub>spf</sub> -CH <sub>2</sub> Cl                | 60                           | 90.74/60.44 | 4.98/4.07   | 4.27/4.0    | -           |
| PAF <sub>spf</sub> -IMes                              | 60                           | 88.29/61.12 | 5.46/4.79   | -           | 2.76/2.93   |
| PAF <sub>spf</sub> -IPy                               | 60                           | 87.09/58.94 | 4.96/4.45   | -           | 4.31/4.39   |

<sup>[a]</sup> It is very well known that in conjugated porous polymers lead to bad combustion and incorrect values of carbon and carbon-hydrogen ratio.<sup>3</sup> <sup>[b]</sup> Related to parent material.

Table S2. Analytical data of the **PAF**-(NHC)M.

| Compound                   | C [wt%] <sup>[a]</sup> | H [wt%] <sup>[a]</sup> | N [wt%] <sup>[a]</sup>  | Metal loading <sup>[b]</sup> |          | Funct.<br>(%) <sup>[c]</sup> |
|----------------------------|------------------------|------------------------|-------------------------|------------------------------|----------|------------------------------|
|                            | calc./found            | calc./found            | calc./found<br>(mmol/g) | [wt%]<br>calc./found         | [mmol/g] |                              |
| PAF <sub>c</sub> -IMesIr   | 87.34/62.51            | 6.02/4.59              | 1.46/1.15 (0.82)        | 3.34/3.78                    | 0.197    | 33                           |
| PAF <sub>c</sub> -IPyIr    | 85.02/60.02            | 5.71/4.36              | 2.17/1.80 (1.26)        | 4.97/4.50                    | 0.226    | 50                           |
| PAF <sub>c</sub> -IMesRu   | 88.21/60.90            | 6.08/4.53              | 1.47/2.03 (1.44)        | 1.76/1.22                    | 0.122    | 33                           |
| PAF <sub>c</sub> -IPyRu    | 86.30/57.34            | 5.81/4.14              | 2.19/2.05 (1.47)        | 2.63/2.34                    | 0.231    | 50                           |
| PAF <sub>spf</sub> -IMesIr | 85.65/55.48            | 5.39/4.26              | 2.63/1.70 (1.22)        | 3.01/2.56                    | 0.133    | 17                           |
| PAF <sub>spf</sub> -IPyIr  | 83.75/58.32            | 4.92/4.29              | 3.43/2.65 (1.89)        | 4.71/4.30                    | 0.224    | 30                           |
| PAF <sub>spf</sub> -IMesRu | 86.41/53.64            | 5.46/3.96              | 2.64/2.17 (1.54)        | 1.59/1.97                    | 0.195    | 17                           |

<sup>[a]</sup> Determined by elemental analyses.

<sup>[b]</sup> Determined by inductively coupled plasma-atomic emission spectrometry (ICP-AES).

<sup>[c]</sup> Related to imidazolium groups.



## FTIR spectra

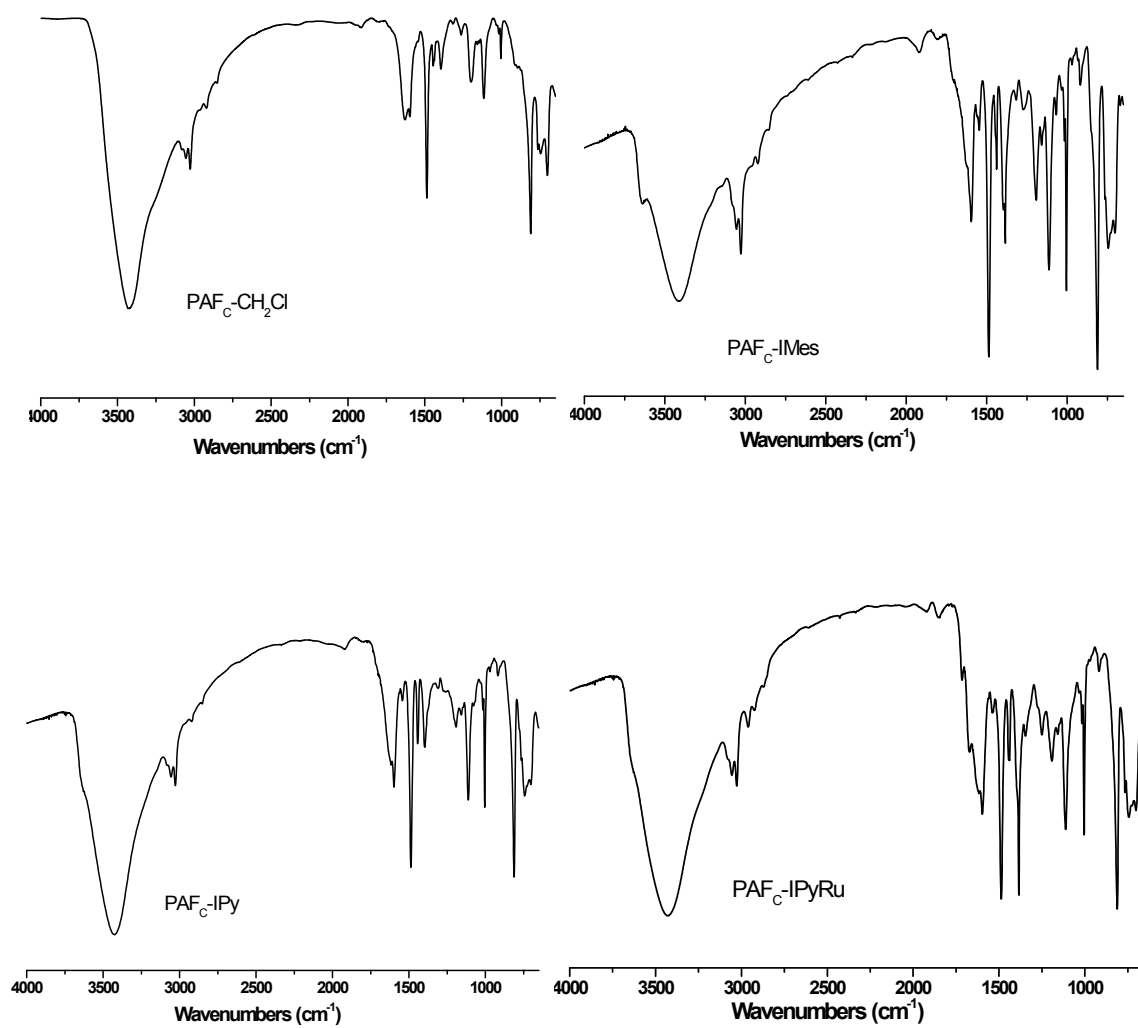Figure S1. FTIR spectra of PAF<sub>c</sub>-materials

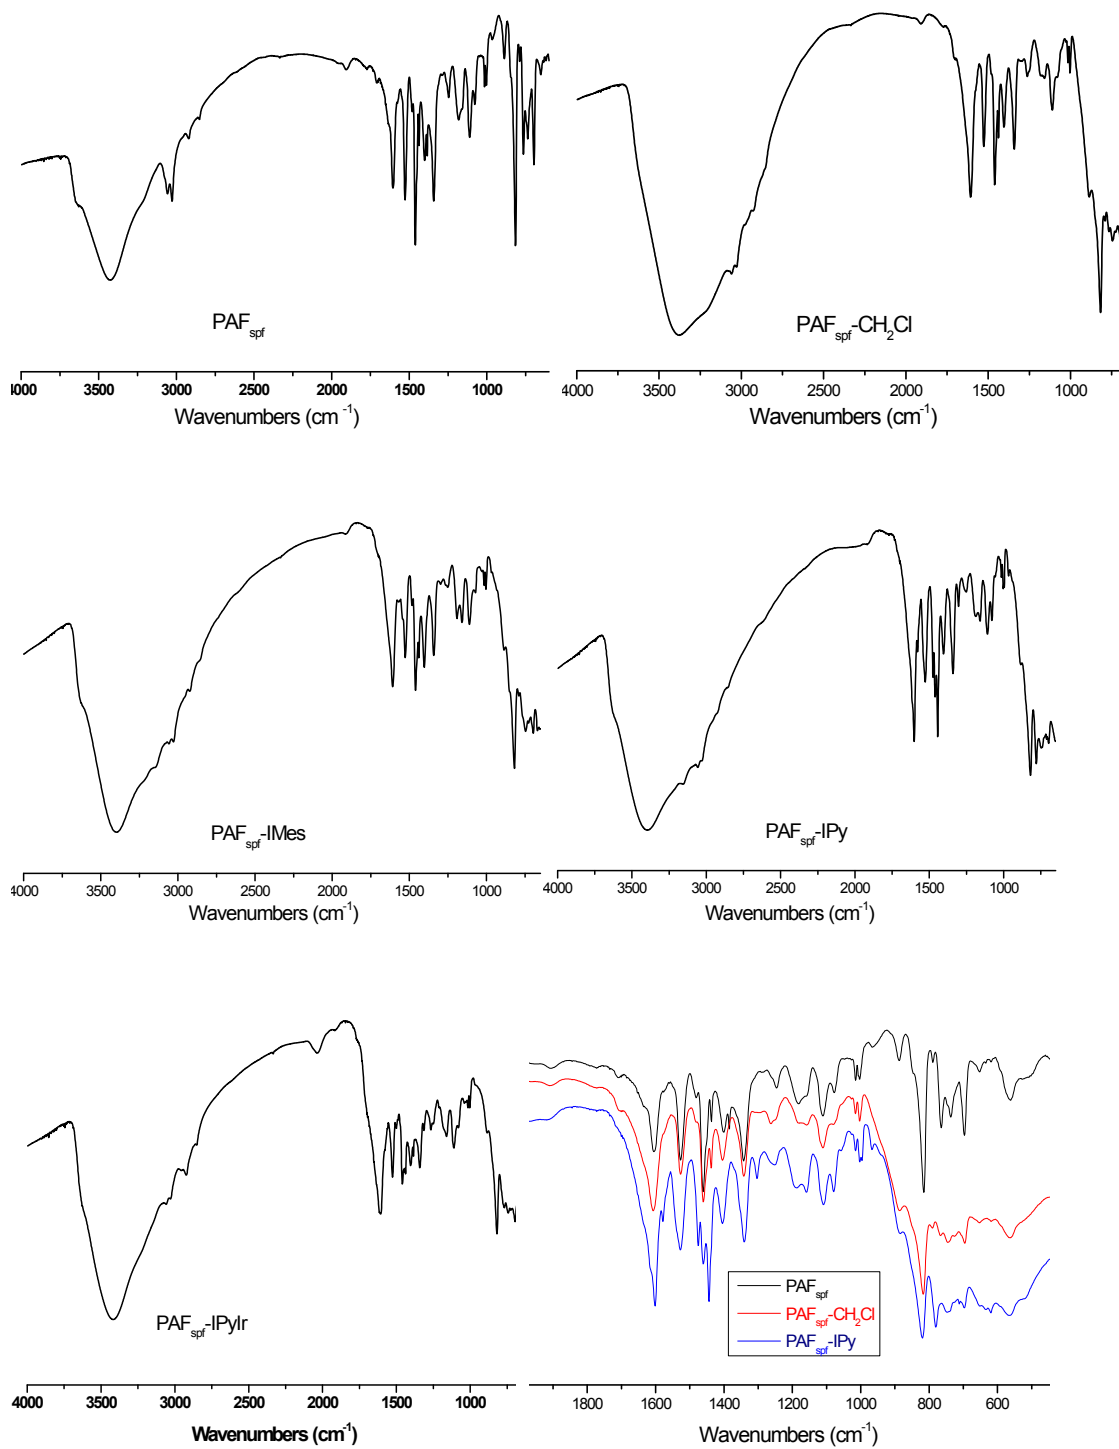

Figure S2. FTIR spectra of  $\text{PAF}_{\text{spf}}$ -materials.

**$^{13}\text{C}$  solid state CP-MAS NMR**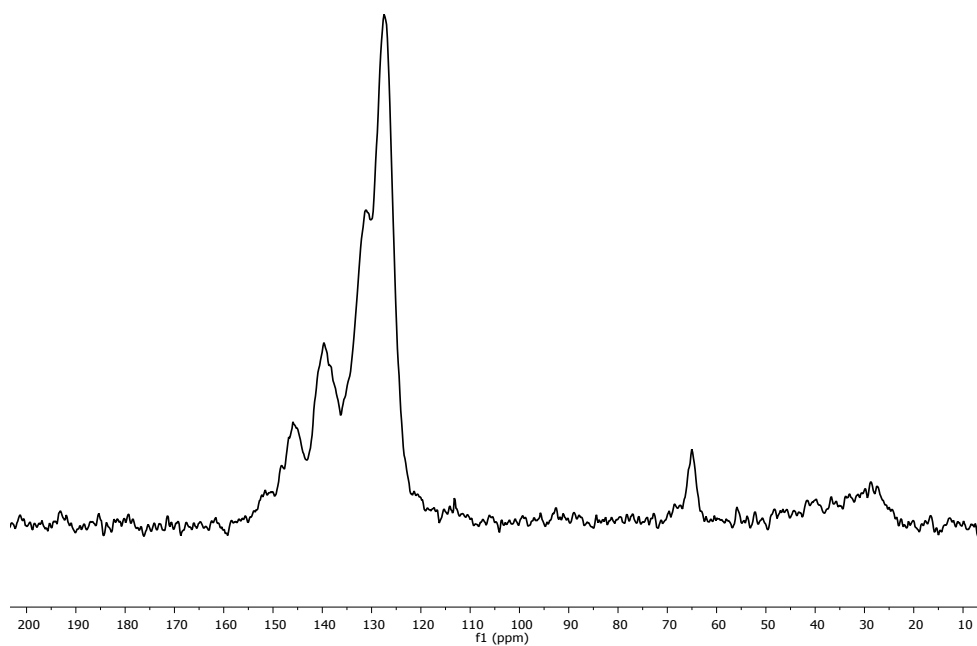Figure S3a.  $^{13}\text{C}$  solid state CP-MAS NMR spectrum of **PAF<sub>c</sub>-CH<sub>2</sub>Cl**.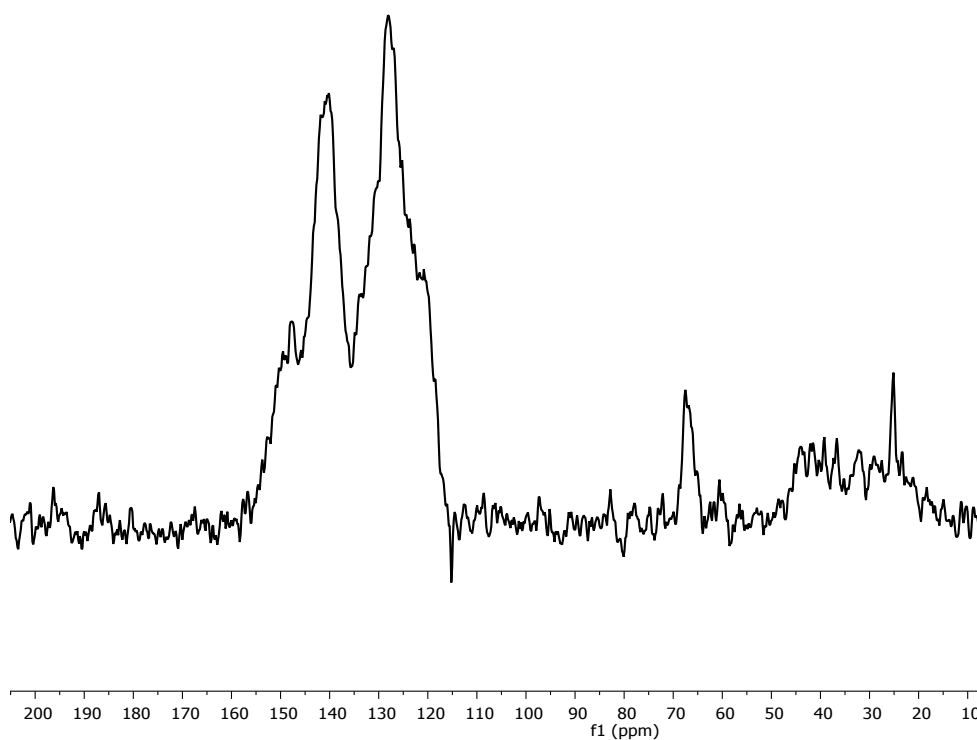Figure S3b.  $^{13}\text{C}$  solid state CP-MAS NMR spectrum of **PAF<sub>spf</sub>-CH<sub>2</sub>Cl**.

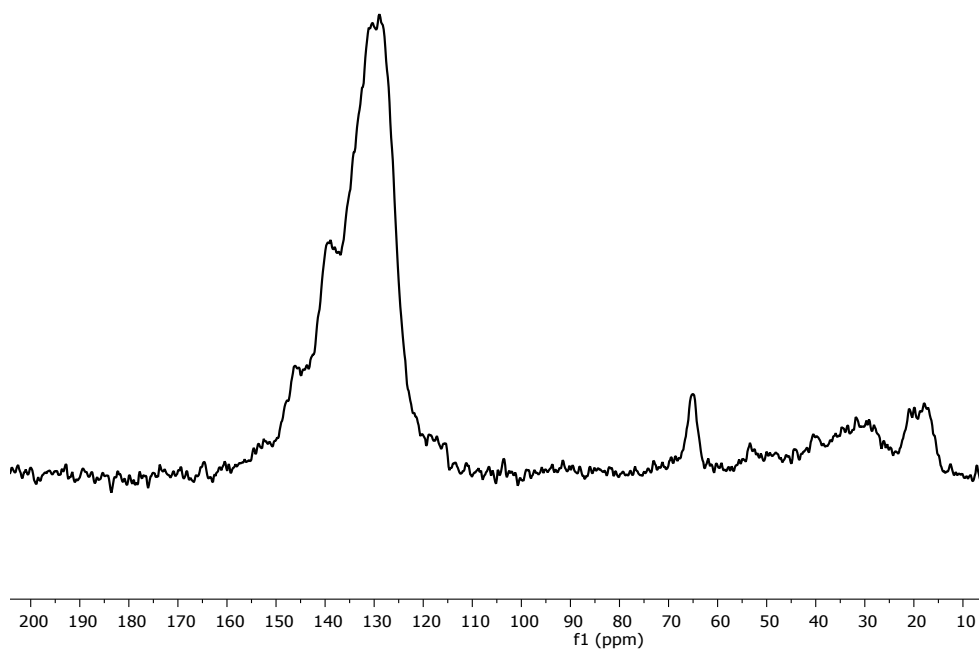

Figure S3c.  $^{13}\text{C}$  solid state CP-MAS NMR spectrum of  $\text{PAF}_c\text{-IMes}$ .

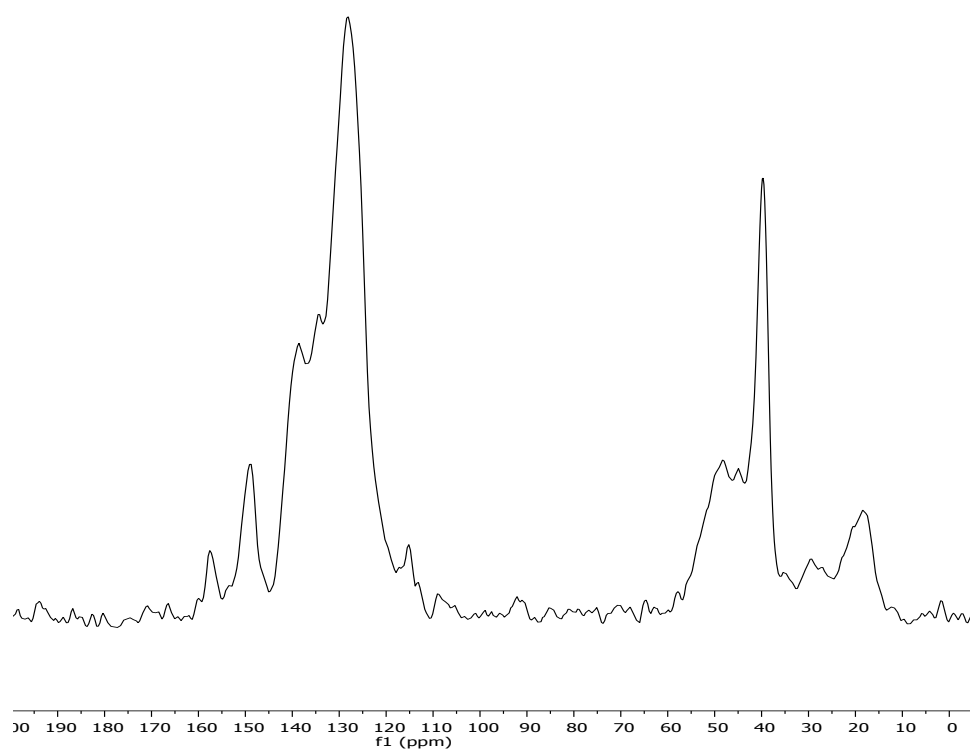

Figure S3d.  $^{13}\text{C}$  solid state CP-MAS NMR spectrum of  $\text{PAF}_{\text{Ad}}\text{-IMes}$ .

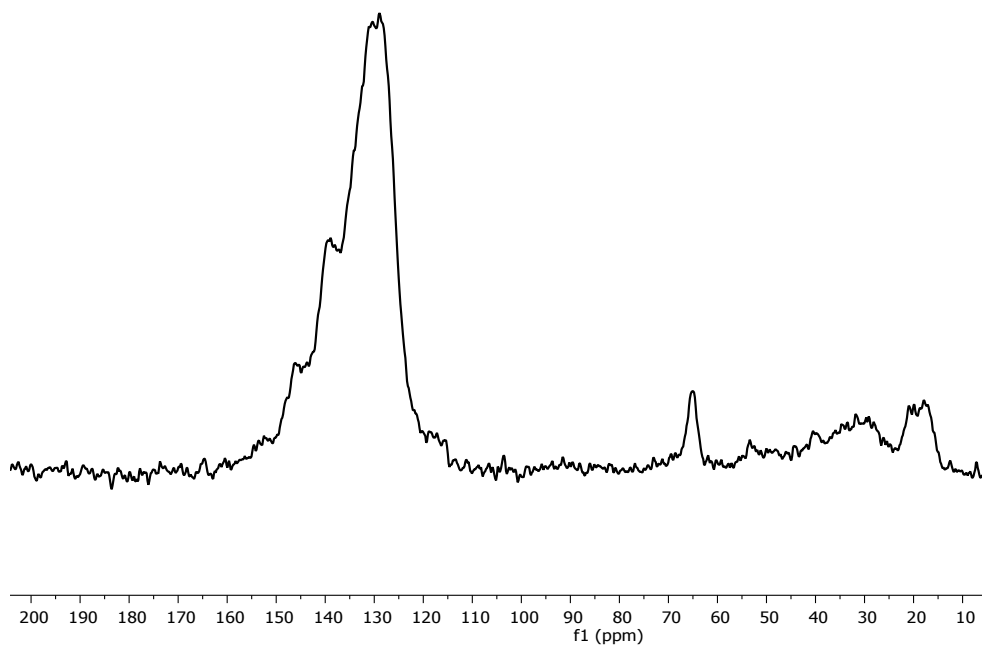

Figure S3e.  $^{13}\text{C}$  solid state CP-MAS NMR spectrum of  $\text{PAF}_{\text{spf}}\text{-IMes}$ .

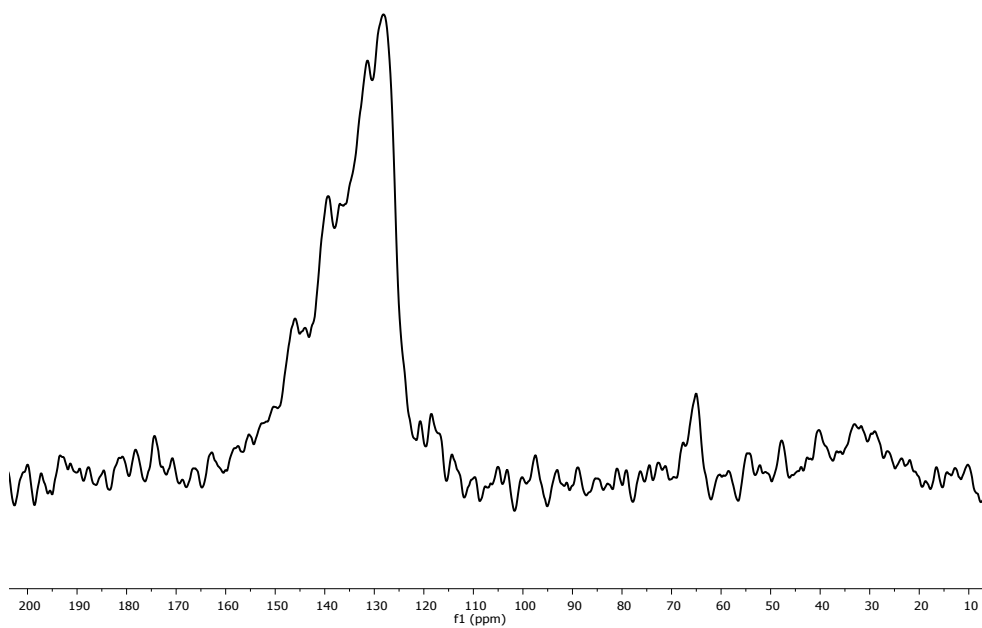

Figure S3f.  $^{13}\text{C}$  solid state CP-MAS NMR spectrum of  $\text{PAF}_{\text{c}}\text{-IPy}$ .

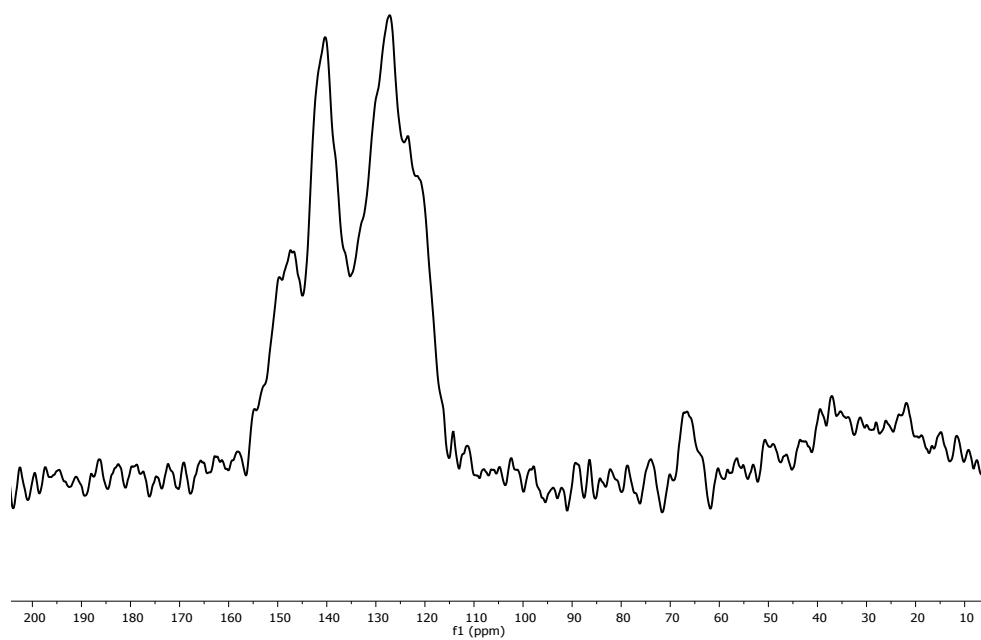

Figure S3g.  $^{13}\text{C}$  solid state CP-MAS NMR spectrum of  $\text{PAF}_{\text{sp}}\text{-IPy}$ .

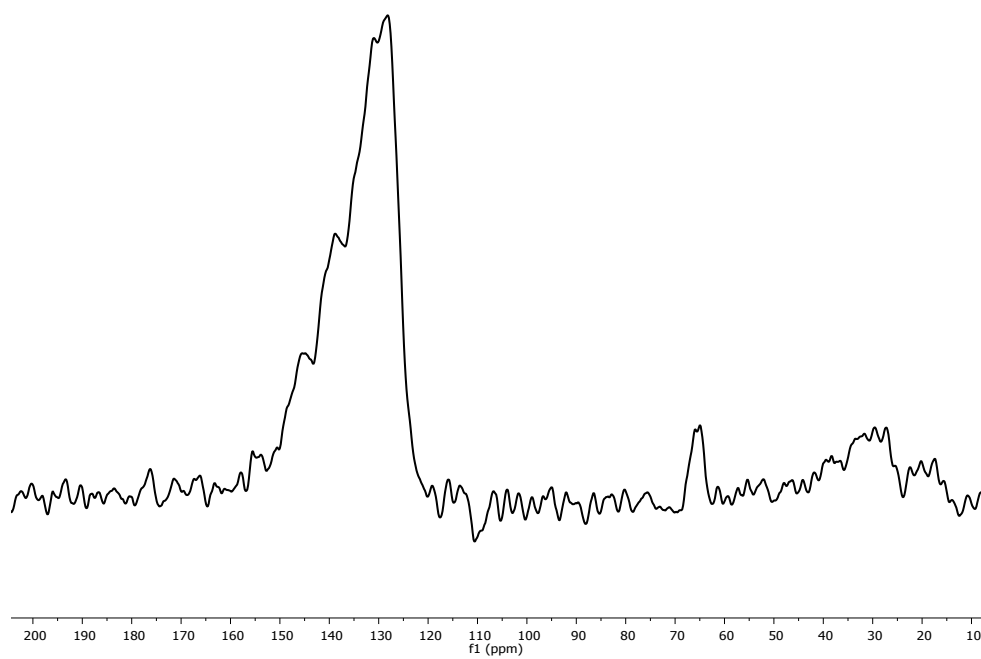

Figure S3h.  $^{13}\text{C}$  solid state CP-MAS NMR spectrum of  $\text{PAF}_{\text{c}}\text{-IMesIr}$ .

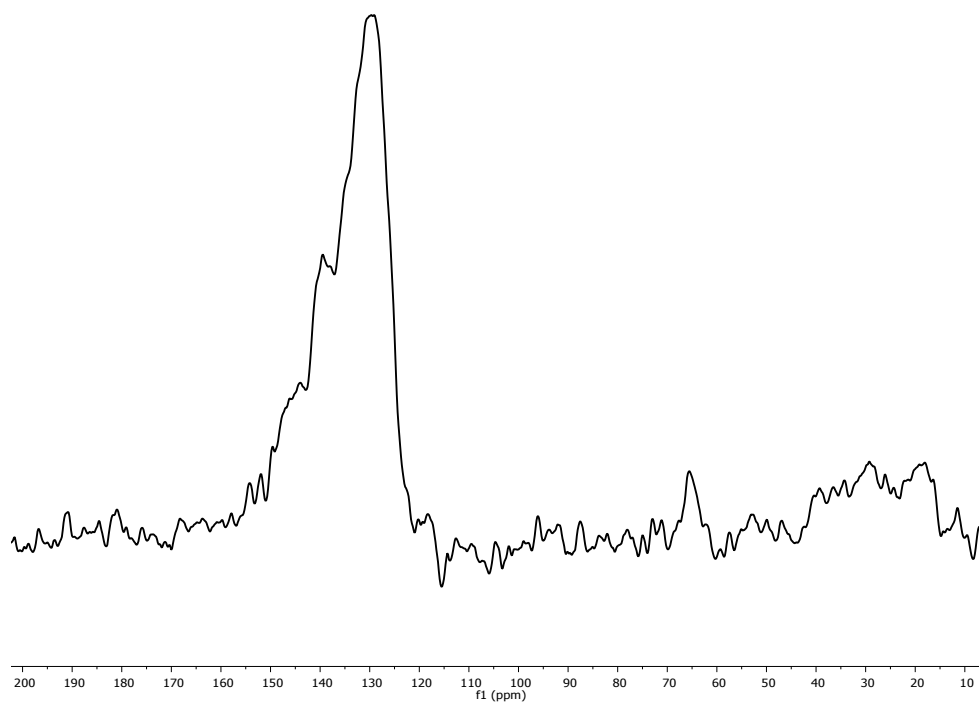

Figure S3i.  $^{13}\text{C}$  solid state CP MAS NMR spectrum of  $\text{PAF}_c\text{-IPyRu}$ .

## Thermogravimetric analyses

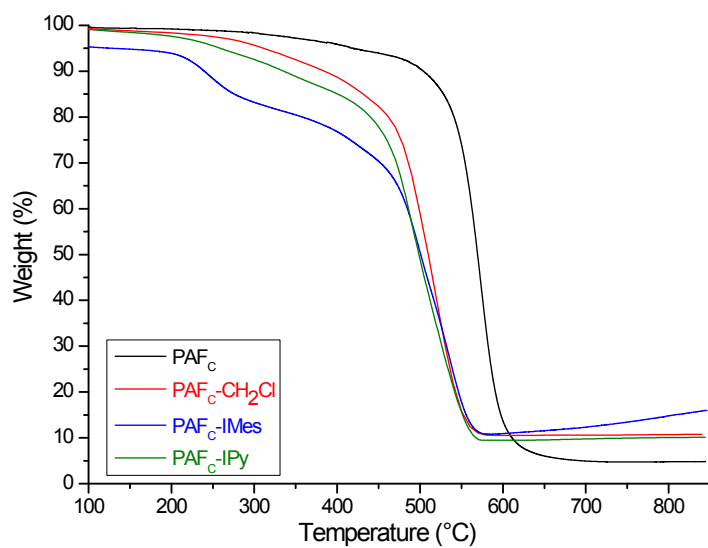

Figure S4a. TGAs of PAF<sub>C</sub>, PAF<sub>C</sub>-CH<sub>2</sub>Cl, PAF<sub>C</sub>-IMes and PAF<sub>C</sub>-IPy.

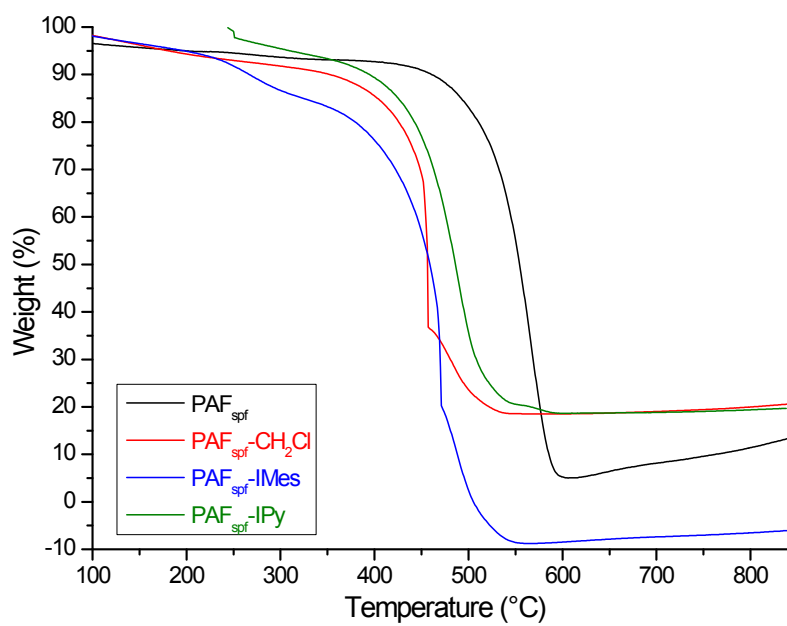

Figure S4b. TGAs of PAF<sub>spf</sub>-derivatives



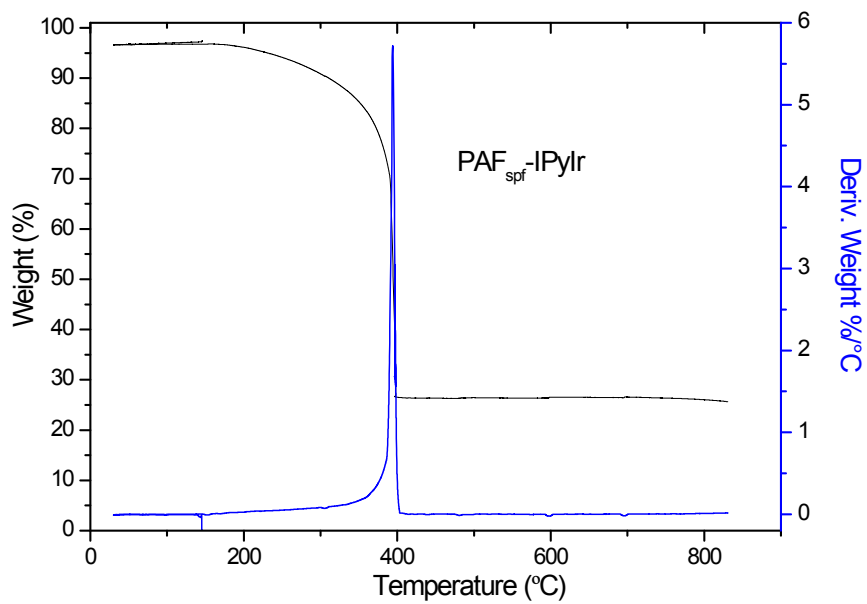Figure S4c. TGAs of PAF<sub>spf</sub>-IPyIr.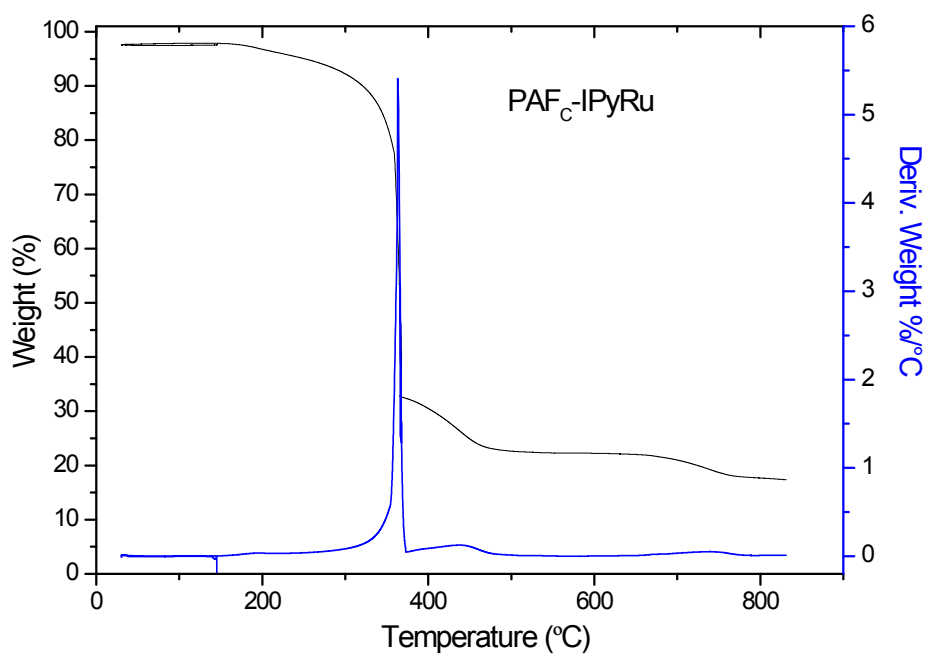Figure S4d. TGAs of PAF<sub>C</sub>-IPyRu.

## SEM images

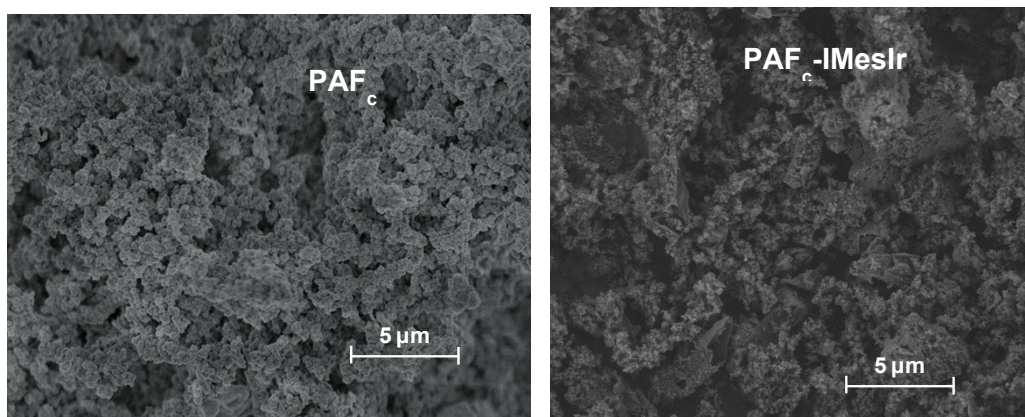Figure S5a. SEM image of  $\text{PAF}_c$  and  $\text{PAF}_c\text{-IMesIr}$ .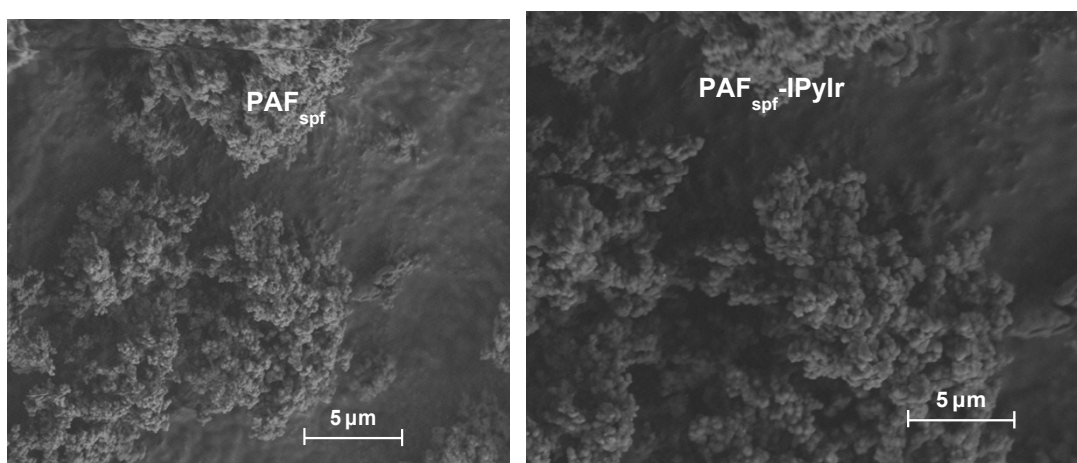Figure S5b. SEM image of  $\text{PAF}_{\text{spf}}$  and  $\text{PAF}_{\text{spf}}\text{-IPyIr}$ .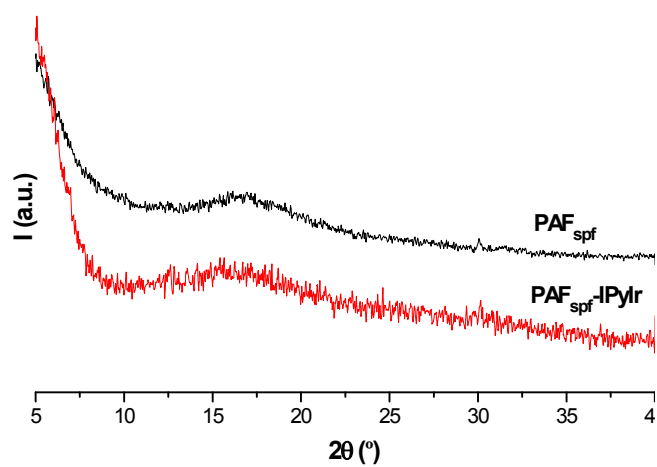Figure S6. PXRD of  $\text{PAF}_{\text{spf}}$  and  $\text{PAF}_{\text{spf}}\text{-IPyIr}$ .

**Textural studies**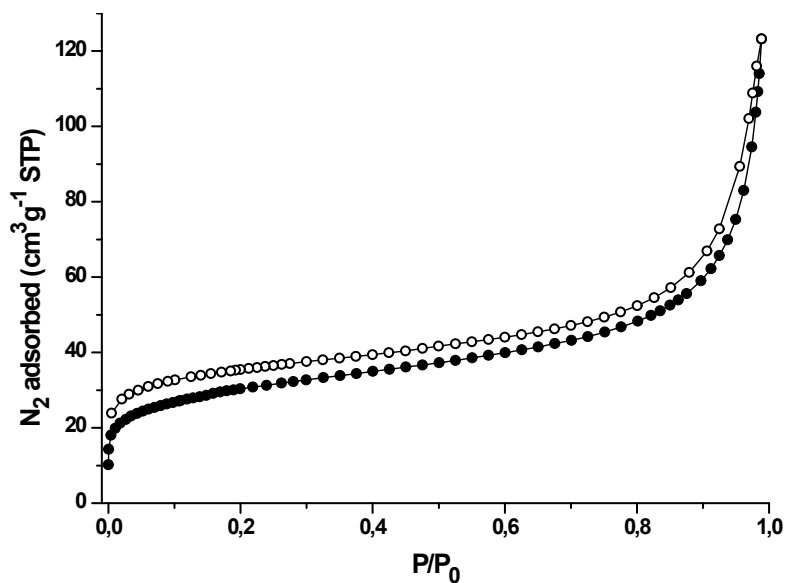

Figure S7a. Nitrogen sorption isotherms (filled circles: adsorption; open circles: desorption) of PAF<sub>C</sub>-IMes at 77 K.

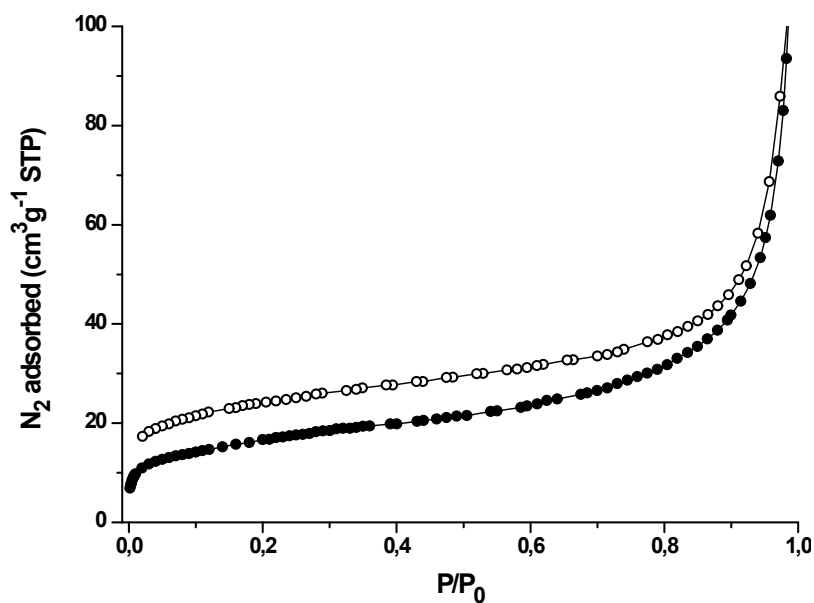

Figure S7b. Nitrogen sorption isotherms (filled circles: adsorption; open circles: desorption) of PAF<sub>Ad</sub>-IMes at 77 K.

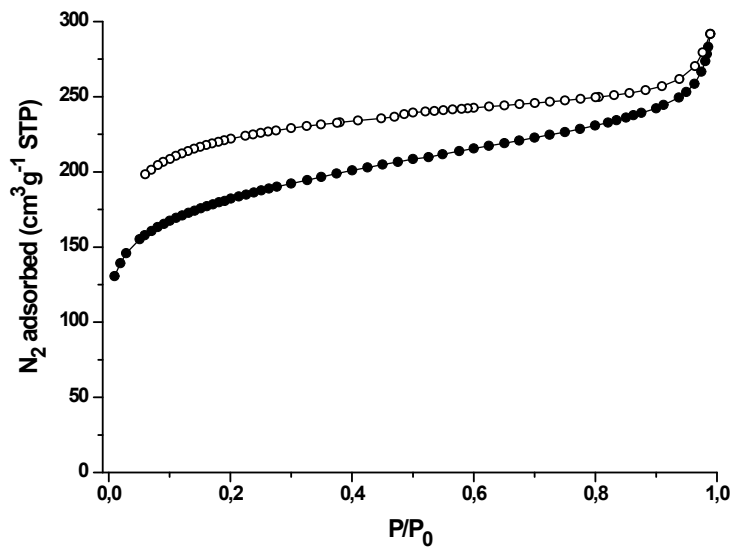

Figure S7c. Nitrogen sorption isotherms (filled circles: adsorption; open circles: desorption) of  $\text{PAF}_{\text{spf}}$  at 77 K.

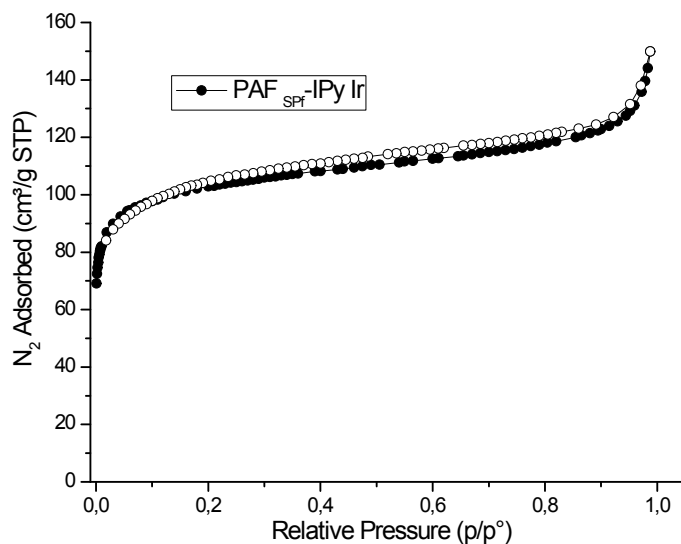

Figure S7d. Nitrogen sorption isotherms (filled circles: adsorption; open circles: desorption) of  $\text{PAF}_{\text{spf-IPyIr}}$  at 77 K.

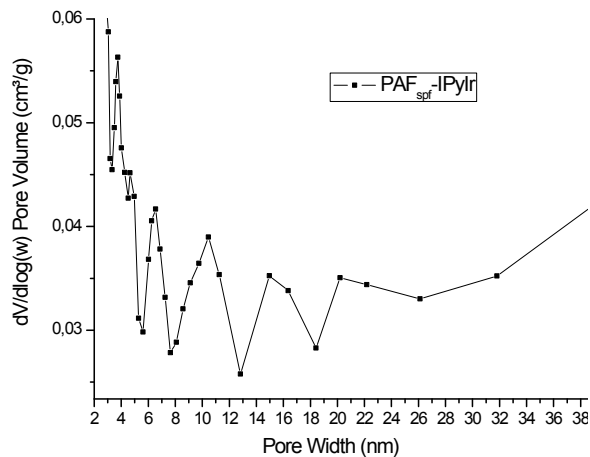

Figure S7e. Pore size distribution for  $\text{PAF}_{\text{spf-IPyIr}}$ .

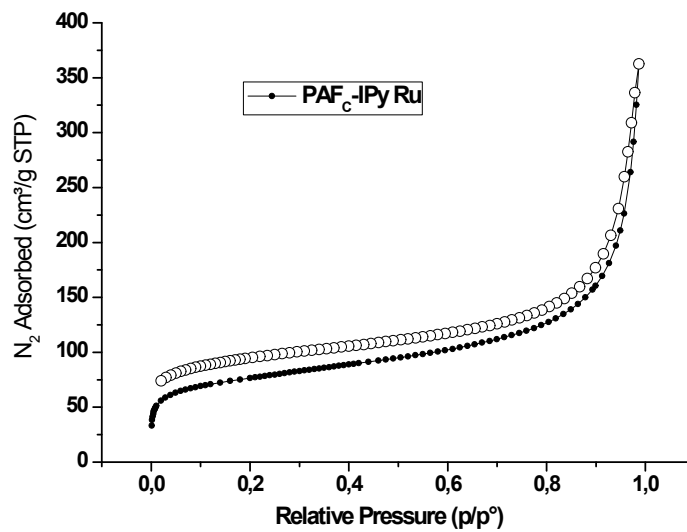

Figure S7f. Nitrogen sorption isotherms (filled circles: adsorption; open circles: desorption) of PAF<sub>c</sub>-IPyRu at 77 K.

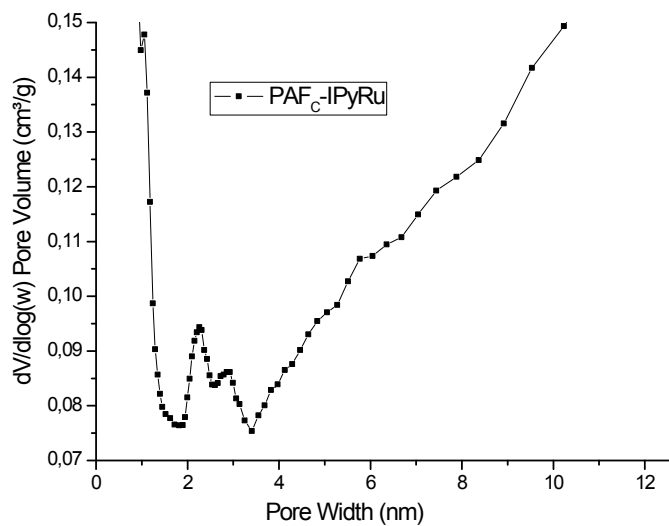

Figure S7g. Pore size distribution for PAF<sub>c</sub>-IPyRu

## Catalytic activity

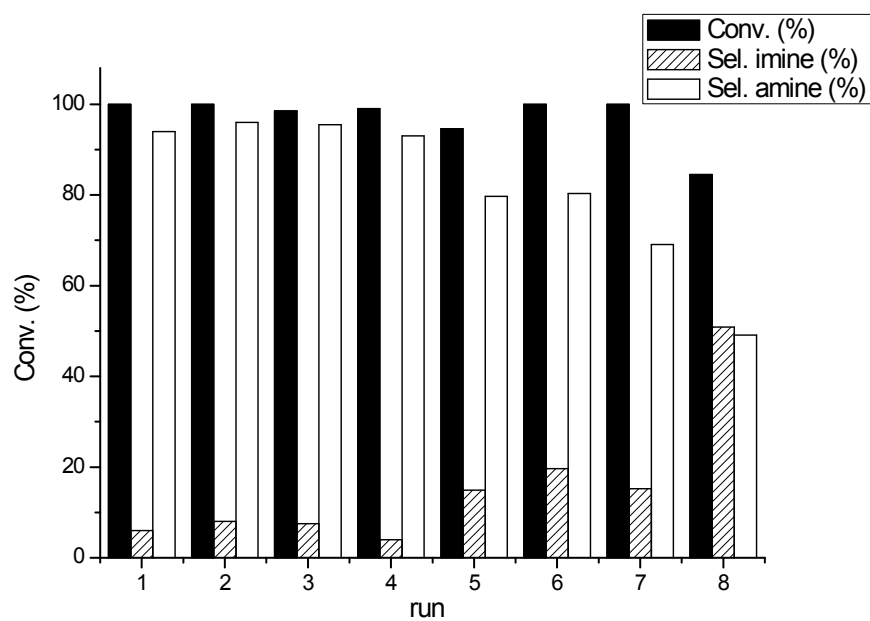

Figure S8. Recycling experiments of PAF<sub>sp</sub>Ir in the *N*-alkylation of *p*-methoxy aniline with benzyl alcohol.

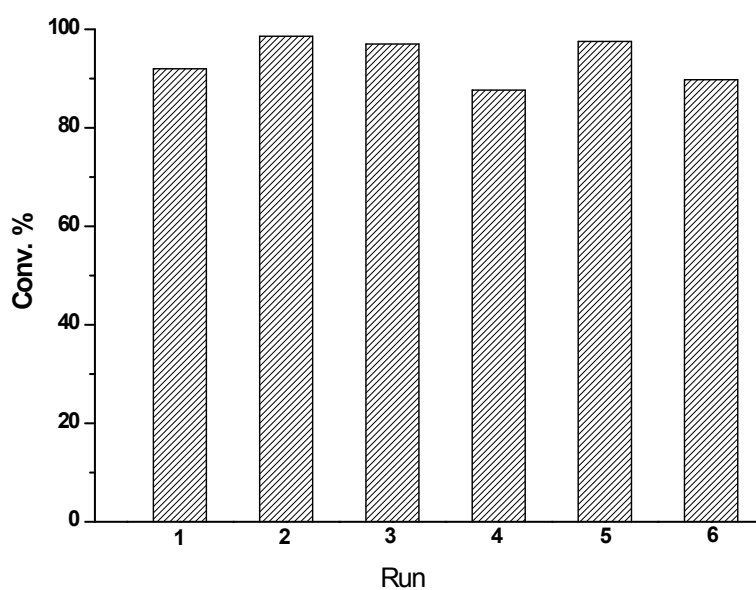

Figure S9. Recycling of PAF<sub>c</sub>-IPyRu in transfer hydrogen from 2-Propanol to acetophenone.

Table S3. Alkylation of aniline with benzyl alcohol using PAFs-(NHC)Ir.<sup>a</sup>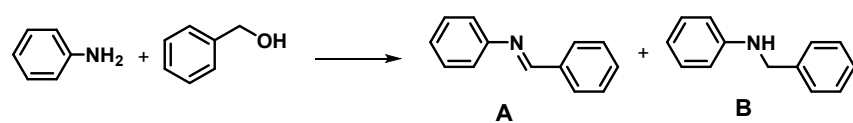

| entry | catalyst                  | Base | catalyst <sup>b</sup> [mol %] | t (h) | yield <sup>c</sup> [%] |      |
|-------|---------------------------|------|-------------------------------|-------|------------------------|------|
|       |                           |      |                               |       | A                      | B    |
| 1     | PAF <sub>spf</sub> -IPyIr | ---  | 2.0                           | 24    | 7.3                    | ---  |
| 2     | PAF <sub>spf</sub> -IPyIr | KOH  | 1.0                           | 4     | 15.4                   | 84.6 |
| 3     | PAF <sub>spf</sub> -IPyIr | KOH  | 0.5                           | 4     | 49.2                   | 50.8 |
|       |                           |      |                               | 24    | 4.1                    | 95.9 |
| 4     | PAF <sub>spf</sub> -IPyIr | KOH  | 0.2                           | 4     | 73.5                   | 17.0 |
|       |                           |      |                               | 24    | 55.6                   | 44.4 |
| 5     | PAF <sub>c</sub> -IMesIr  | KOH  | 2.0                           | 4     | 9.13                   | 89.9 |

<sup>a</sup>Reaction conditions: aniline (0.104 mmol), benzyl alcohol (0.208), KOH (1.3 eq.), toluene (0.3 mL), 130 °C. <sup>b</sup>based on iridium. <sup>c</sup>Yields determined via GC and GC-MS.

Table S4. Alkylation of aniline with benzyl alcohol using **PAFs**-(NHC)M.<sup>a</sup>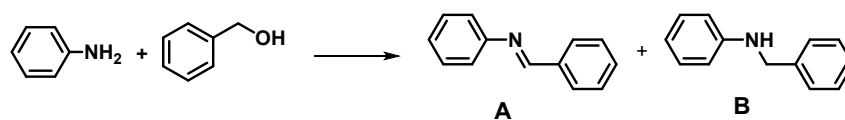

| entry | catalyst                   | t (h) | Conv. <sup>b</sup> [%] | Sel. [%] |      |
|-------|----------------------------|-------|------------------------|----------|------|
|       |                            |       |                        | A        | B    |
| 1     | PAF <sub>spF</sub> -IPyIr  | 4     | 100                    | 49.2     | 50.8 |
| 2     |                            | 24    | 100                    | 4.1      | 95.9 |
| 3     | PAF <sub>spF</sub> -IMesIr | 4     | 93.1                   | 52.9     | 47.9 |
| 4     |                            | 24    | 100                    | 14.1     | 85.9 |
| 5     | PAF <sub>spF</sub> -IMesRu | 4     | 66.6                   | 61.9     | 38.1 |
| 6     |                            | 24    | 91.7                   | 33.8     | 66.2 |
| 7     | PAF <sub>c</sub> -IPyIr    | 4     | 82.4                   | 73.3     | 26.7 |
| 8     |                            | 24    | 100                    | 22.1     | 77.9 |
| 9     | PAF <sub>c</sub> -IMesIr   | 4     | 92.4                   | 52.4     | 47.6 |
| 10    |                            | 24    | 100                    | 20.8     | 79.2 |
| 11    | PAF <sub>c</sub> -IMesRu   | 4     | 72.7                   | 56.9     | 8.1  |
| 12    |                            | 24    | 100                    | 94.3     | 5.7  |

<sup>a</sup>Reaction conditions: aniline (0.104 mmol), benzyl alcohol (0.208 mmol), KOH (1.3 eq.), toluene (0.3 mL), 130 °C, 0.5 mol(%) based on iridium. <sup>b</sup>Yields determined via GC and GC-MS.



Table S5. Alkylation of anilines with benzyl alcohol using **PAFs**-(NHC)M in water.<sup>a</sup>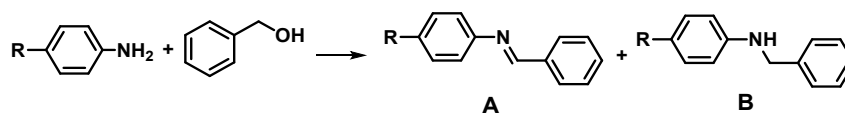

| entry | catalyst                  | mmol (%) <sup>b</sup> | Base                           | R                | Selec. [%]  |      |
|-------|---------------------------|-----------------------|--------------------------------|------------------|-------------|------|
|       |                           |                       |                                |                  | A           | B    |
| 1     |                           | 0.5                   | KOH                            | H                | 40.0 (24h)  | -    |
| 2     | PAF <sub>spf</sub> -IPyIr | 2.0                   | KOH                            | H                | 14.6 (24h)  | 16.1 |
| 3     |                           | 0.5                   | K <sub>2</sub> CO <sub>3</sub> | H                | 10.2 (24h)  | 4.9  |
| 4     |                           | 0.5                   | (Et) <sub>3</sub> N            | H                | -           | -    |
| 5     |                           | 0.5                   | ( <i>i</i> Pr) <sub>2</sub> NH | H                | 23.30 (48h) |      |
| 6     | PAF <sub>c</sub> -IMesIr  | 3.0                   | KO <sup><i>t</i></sup> Bu      | H                | 51.23 (24h) | 6.1  |
| 7     |                           | 3.0                   | KOH                            | H                | 64.1 (24h)  | 3.4  |
| 8     |                           | 3.0                   | KOH                            | CH <sub>3</sub>  | 91.3 (24h)  | -    |
| 9     |                           | 3.0                   | KOH                            | Cl               | 95.6 (24h)  | -    |
| 10    |                           | 3.0                   | KOH                            | OCH <sub>3</sub> | 62.3 (24h)  | 37.7 |

<sup>a</sup>Reaction conditions: aniline (0.104 mmol), benzyl alcohol (0.208 mmol), 100 °C. <sup>b</sup>based on iridium. <sup>c</sup>Yields determined via GC and GC-MS.

Table S6. Recycling experiments for the coupling reaction of benzyl alcohol and 4-chloroaniline in water.<sup>a</sup>

| entry | time (h) | Conv. <sup>b</sup> [%] | Selec. [%] |     |
|-------|----------|------------------------|------------|-----|
|       |          |                        | A          | B   |
| 1     | 4        | 10.7                   | 10.7       | --- |
|       | 24       | 95.6                   | 95.6       | --- |
| 2     | 4        | 47.8                   | 47.8       | --- |
|       | 24       | 100                    | 54.65      | --  |
| 3     | 4        | 9.25                   | 9.25       | --- |
|       | 24       | 58.1                   | 58.1       | --- |
| 4     | 4        | 11.4                   | 11.4       | --- |
|       | 24       | 57.4                   | 57.4       | --- |

<sup>a</sup> Reaction conditions: 4-chloroaniline (0.104 mmol), benzyl alcohol (0.208 mmol), KOH (1.3 eq.), 130 °C, 0.3 mL water, 3.0 % mol (%) based on iridium. <sup>b</sup> Determined by GC and GC-MS analysis.

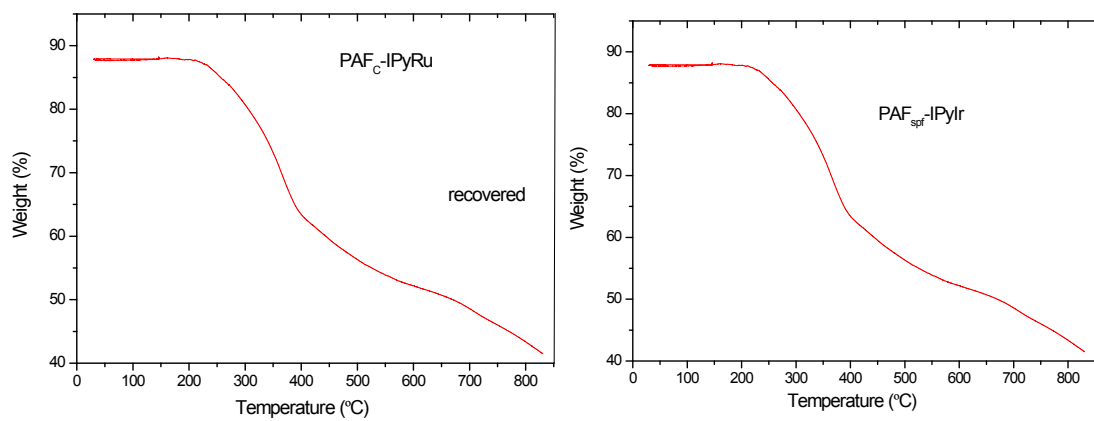

Figure S10. TGAs of recovered catalysts after four cycles.

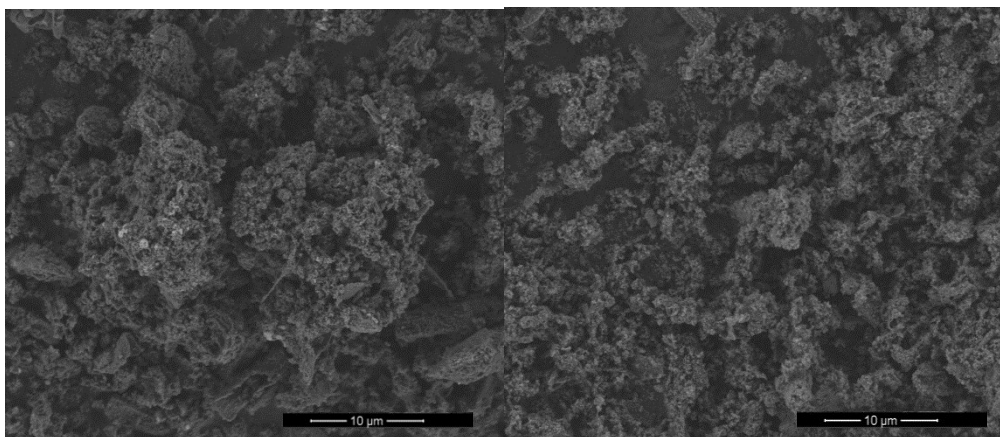

Figure S11. SEM image of  $\text{PAF}_C\text{-IMesIr}$  and  $\text{PAF}_{\text{spr}}\text{-IPyIr}$  recovered after recycling.
